# Supplementary material for: Loss of E-Cadherin Promotes Metastasis via Multiple Downstream Transcriptional Pathways
Source: Oxford University Press journal article supplement (doi:10.1158/0008-5472.can-07-2938), 2008-05-15
Supplement: 00085472can072938-sup-suplemantal_table_2.xls [file 00085472can072938-sup-suplemantal_table_2.xls]

## Sheet: Sheet1
Probes and the corresponding genes upregulated more than 1.5 log-fold in DN-Ecad cells
Symbol	ProbeID	DN-Ecad vs shCntrl log-fold change
GDF15	221577_x_at	4.1944
TSC22D3	208763_s_at	3.9408
TSC22D3	207001_x_at	3.7186
RNASE4	213397_x_at	3.1831
ATF3	202672_s_at	3.1734
CYP4F11	206153_at	3.0435
AKR1C1	204151_x_at	2.9432
FBN2	215717_s_at	2.8419
AKR1C2	209699_x_at	2.7631
SSBP1	214060_at	2.6847
KDELR3	204017_at	2.6659
P8	209230_s_at	2.6504
PER1	202861_at	2.5846
AKR1C1	216594_x_at	2.5782
INPP5D	203332_s_at	2.5519
CTH	217127_at	2.5324
HCP5	206082_at	2.5295
PTGS1	205127_at	2.5056
LEPR	209894_at	2.5029
PRSS8	202525_at	2.4523
CTH	206085_s_at	2.4451
KDELR3	207265_s_at	2.4338
TXNIP	201010_s_at	2.3868
BLNK	207655_s_at	2.3624
AKR1C2	211653_x_at	2.3226
ANG	205141_at	2.3182
FTL	213187_x_at	2.2974
BHLHB3	221530_s_at	2.2631
CALML4	64408_s_at	2.2382
LGALS7	206400_at	2.2194
LHX6	219884_at	2.2014
FBXO2	219305_x_at	2.1947
C1QL1	205575_at	2.1872
TCEA2	203919_at	2.1745
RNASE4	205158_at	2.1719
IL1RAP	210233_at	2.1675
SEMA3F	206832_s_at	2.1453
FLJ13710	219153_s_at	2.143
PER1	36829_at	2.1385
SENP6	214790_at	2.1233
LTB	207339_s_at	2.1183
STC2	203438_at	2.1117
ALOX15B	206714_at	2.1082
EPHB3	1438_at	2.1061
ZNF198	210282_at	2.0994
EPHX1	202017_at	2.0975
CRELD1	203368_at	2.0948
TXNIP	201008_s_at	2.0851
TXNIP	201009_s_at	2.0652
GABARAPL3	211458_s_at	2.0647
PER2	205251_at	2.0641
MGC4504	219270_at	2.0597
H1FX	204805_s_at	2.0426
STC2	203439_s_at	2.035
CCNA1	205899_at	2.0262
ALDH6A1	221589_s_at	2.0076
PFAAP5	214753_at	1.9902
CALML4	221879_at	1.9777
DNAJB9	202843_at	1.9752
GPC1	202755_s_at	1.9661
CYP1B1	202437_s_at	1.9619
PNRC1	209034_at	1.9592
NR1D2	209750_at	1.9457
BTG2	201236_s_at	1.9384
	AFFX-HUMRGE/M10098_5_at	1.9076
EML2	204398_s_at	1.9042
ALDH6A1	221588_x_at	1.9016
FTL	212788_x_at	1.9006
DBP	209782_s_at	1.8997
AKR1C2	217626_at	1.8986
C1orf38	210785_s_at	1.8979
CRIP2	208978_at	1.8917
BCL6	203140_at	1.8899
ABCG1	204567_s_at	1.8889
SLC39A7	202667_s_at	1.8446
LAPTM5	201721_s_at	1.8392
MAGED2	208682_s_at	1.8239
CABC1	218168_s_at	1.8219
CELSR2	204029_at	1.8212
FLJ40092	213605_s_at	1.8185
CPT1B	210069_at	1.8113
ALDH6A1	204290_s_at	1.8091
TNFSF7	206508_at	1.7891
Cep152	215170_s_at	1.7891
KLF9	203543_s_at	1.7802
MAGED1	209014_at	1.7789
EFS	204400_at	1.7773
C1orf38	207571_x_at	1.7762
GOLGA4	215203_at	1.7734
STCH	202557_at	1.7591
KDELR3	207264_at	1.7589
KLF9	203542_s_at	1.7578
GPX3	201348_at	1.7546
AKR1B10	206561_s_at	1.753
LRP5	209468_at	1.7498
PHGDH	201397_at	1.7479
CTTN	214073_at	1.7473
PCK2	202847_at	1.7472
ASNS	205047_s_at	1.7427
GOLGA2	204384_at	1.74
KIAA0323	212356_at	1.7353
USP52	203117_s_at	1.7313
ABHD4	218581_at	1.7304
TP53AP1	209917_s_at	1.7236
ZNF451	215012_at	1.72
NINJ1	203045_at	1.7163
ZNF184	213452_at	1.7163
CSRP2	211126_s_at	1.7117
PGM3	221788_at	1.7105
ZNF516	203604_at	1.7088
DATF1	213213_at	1.7052
LOC81558	221249_s_at	1.7037
LRDD	221640_s_at	1.7006
DLGAP4	202570_s_at	1.6998
FLJ22639	220399_at	1.6959
ZNF226	219603_s_at	1.6908
POMZP3	210910_s_at	1.6887
MAGED2	213627_at	1.6875
CD44	210916_s_at	1.6867
EGFR	201984_s_at	1.6831
TGFB1	203085_s_at	1.6765
PRKCA	213093_at	1.6747
RRAS	212647_at	1.6721
CYP4F3	206515_at	1.6659
C9orf16	204480_s_at	1.6656
KIAA0657	213946_s_at	1.6617
SMA4	215599_at	1.6564
SEC24D	202375_at	1.6557
NR1D1	31637_s_at	1.6482
KCNMA1	221584_s_at	1.6449
EPHB3	204600_at	1.6394
PRSS16	208165_s_at	1.6394
GCLC	202922_at	1.6346
BTN3A3	38241_at	1.6316
CARM1	221939_at	1.6284
WIPI49	213836_s_at	1.6116
C1orf66	218914_at	1.6106
PPFIBP1	214375_at	1.6084
FLJ20254	217899_at	1.6053
PDE4DIP	213388_at	1.6019
LEPRE1	220750_s_at	1.6007
GABARAPL1	208869_s_at	1.6002
MDM2	217373_x_at	1.6001
EFEMP2	206580_s_at	1.5989
APOE	203381_s_at	1.5933
MMP28	219909_at	1.589
IL15	205992_s_at	1.5869
YIPF2	219075_at	1.5852
MST1	216320_x_at	1.5833
GFPT1	202722_s_at	1.5823
PFAAP5	221899_at	1.5822
POMZP3	204148_s_at	1.5783
HCFC1R1	45714_at	1.5757
IGFBP2	202718_at	1.5741
LOC440996	222380_s_at	1.5735
DKFZP586A0522	207761_s_at	1.5652
ZBTB16	205883_at	1.5627
VDP	222316_at	1.5618
C17orf39	220058_at	1.5536
FLJ13841	219995_s_at	1.5473
DKFZP586H2123	213661_at	1.5465
HCFC1R1	218537_at	1.545
PDE4DIP	212390_at	1.5442
DAF	201925_s_at	1.542
CXorf12	204340_at	1.5399
AKR1C3	209160_at	1.539
HERC1	218306_s_at	1.537
PRKAG2	215231_at	1.5346
CDKN1B	209112_at	1.5296
WIG1	219628_at	1.5088
IGSF4C	215259_s_at	1.5075
KLHL24	221985_at	1.5054
Probes and the corresponding genes down-regulated more than 1.5 log-fold in DN-Ecad cells
Symbol	ProbeID	DN-Ecad vs shCntrl log-fold change
SPRR2D	208539_x_at	-4.3198
MMP10	205680_at	-4.2073
CXCL1	204470_at	-4.0769
FST	207345_at	-4.0606
IL1R2	205403_at	-4.0554
IL8	202859_x_at	-3.9569
IL8	211506_s_at	-3.921
KRT13	207935_s_at	-3.9183
IL1R2	211372_s_at	-3.7659
HS3ST2	219697_at	-3.3521
CEACAM6	211657_at	-3.3036
CEACAM6	203757_s_at	-3.2004
GPRC5A	203108_at	-3.0806
CALM1	211985_s_at	-3.0647
EIF5	208290_s_at	-3.0519
CALM1	211984_at	-3.0442
IGFBP3	210095_s_at	-3.0149
SERPINB2	204614_at	-2.9858
VGLL1	215729_s_at	-2.9829
SKP2	203626_s_at	-2.9714
PI3	203691_at	-2.9026
TP73L	211194_s_at	-2.859
GLIPR1	204222_s_at	-2.8157
KLK7	205778_at	-2.8134
CYB5R2	220230_s_at	-2.808
S100A7	205916_at	-2.7237
HSPH1	208744_x_at	-2.7057
CCNE2	211814_s_at	-2.697
MCM10	220651_s_at	-2.6952
FST	204948_s_at	-2.6801
PI3	41469_at	-2.664
KRTHA4	206969_at	-2.6427
IL1F9	220322_at	-2.6016
NUP98	210793_s_at	-2.6009
PHLDA1	217997_at	-2.5848
MFAP5	213765_at	-2.5762
PTGS2	204748_at	-2.5541
DKK1	204602_at	-2.5467
CXCL3	207850_at	-2.5315
PHTF2	217097_s_at	-2.5245
LCMT2	204012_s_at	-2.4783
CCNE2	205034_at	-2.4477
TMEM16A	218804_at	-2.3826
BCLAF1	201101_s_at	-2.3719
B3GNT1	219326_s_at	-2.3171
ENC1	201340_s_at	-2.3116
SCEL	206884_s_at	-2.3114
ARL7	202206_at	-2.3046
FLJ21511	220723_s_at	-2.29
TMPRSS11E	220431_at	-2.2847
C12orf4	218374_s_at	-2.2585
EIF5	208708_x_at	-2.249
ENC1	201341_at	-2.2372
EXOSC2	214507_s_at	-2.2268
IL6ST	204864_s_at	-2.2199
MGC14376	214696_at	-2.2186
KRT15	204734_at	-2.2046
SFPQ	201585_s_at	-2.1846
LCN2	212531_at	-2.1846
CDC27	217878_s_at	-2.1747
DNAJA1	200880_at	-2.1725
OSMR	205729_at	-2.1697
CXCL2	209774_x_at	-2.1596
ADAMTS1	222162_s_at	-2.1594
ARHGAP25	204882_at	-2.1571
POP1	213449_at	-2.1331
EDN1	218995_s_at	-2.126
IL7R	205798_at	-2.1137
G3BP	201514_s_at	-2.1122
PTHLH	206300_s_at	-2.0935
DSC2	204751_x_at	-2.0817
DRIM	209725_at	-2.0775
MFAP5	209758_s_at	-2.0762
DHX9	212107_s_at	-2.0727
MFAP5	213764_s_at	-2.0715
ARHGAP25	38149_at	-2.0603
EIF5	208706_s_at	-2.0511
PTHLH	210355_at	-2.0479
DUSP6	208893_s_at	-2.0452
EPN3	220318_at	-2.038
EIF5	208705_s_at	-2.0349
UTP14A	221513_s_at	-2.0307
ILF3	208931_s_at	-2.0206
MAP4	200835_s_at	-2.0137
HSPA8	210338_s_at	-2.0124
UTP14A	221514_at	-2.004
SPAG1	210117_at	-1.9953
NUP50	218294_s_at	-1.9791
TMEM2	218113_at	-1.9725
NAV3	204823_at	-1.9709
SERPINB13	216258_s_at	-1.9641
ST6GALNAC5	220979_s_at	-1.9609
IFIT5	203595_s_at	-1.9533
ATP12A	207367_at	-1.9519
SERPINB1	213572_s_at	-1.948
SFPQ	201586_s_at	-1.9475
DCBLD2	213865_at	-1.9457
JAG1	209098_s_at	-1.9426
DDX18	205763_s_at	-1.9341
TMPO	209754_s_at	-1.9261
CSF3	207442_at	-1.9234
HSPA8	208687_x_at	-1.919
SERPINB13	211362_s_at	-1.9037
FOSL1	204420_at	-1.8928
CANX	208853_s_at	-1.8924
PHLDA1	218000_s_at	-1.8906
LGALS8	210732_s_at	-1.8892
HRB2	214085_x_at	-1.8747
MDSRP	218587_s_at	-1.8684
C1orf42	220620_at	-1.8638
GLIPR1	204221_x_at	-1.8539
EIF4G1	208624_s_at	-1.8512
BAT2D1	211947_s_at	-1.8494
B3GALT3	211812_s_at	-1.8483
EML4	220386_s_at	-1.8393
CSF2	210229_s_at	-1.83
PPP2R1B	202883_s_at	-1.8237
PTHLH	211756_at	-1.8203
HMGCS1	205822_s_at	-1.8191
IGFBP3	212143_s_at	-1.8186
FEN1	204768_s_at	-1.8169
LOC51136	221194_s_at	-1.8152
CDC6	203967_at	-1.7993
UGCG	221765_at	-1.7962
C1orf116	219856_at	-1.7907
SERPINB8	206034_at	-1.7817
ZNF365	206448_at	-1.7795
BRIP1	221703_at	-1.7702
IL1B	39402_at	-1.7665
NCBP1	209520_s_at	-1.7664
HNRPM	200072_s_at	-1.7603
SOX9	202935_s_at	-1.7505
G3BP2	206383_s_at	-1.7421
UMPS	215165_x_at	-1.7319
SFRS3	208673_s_at	-1.73
WTAP	210285_x_at	-1.7297
EXOSC2	209527_at	-1.7263
FBXO9	210638_s_at	-1.7225
IVL	214599_at	-1.7207
EHF	219850_s_at	-1.7163
DHX9	212105_s_at	-1.712
METAP2	213899_at	-1.7109
DDX18	208896_at	-1.6964
SETMAR	206554_x_at	-1.6918
UMPS	202706_s_at	-1.6917
SMARCC1	201072_s_at	-1.6892
C14orf169	219526_at	-1.6877
SUB1	221727_at	-1.6856
SOX9	202936_s_at	-1.6813
STARD13	213103_at	-1.6795
ETS1	214447_at	-1.6752
LARP4	214155_s_at	-1.6748
ATP13A3	219558_at	-1.672
KLK10	215808_at	-1.6714
MYO5C	218966_at	-1.6712
SP100	210218_s_at	-1.6577
HCCS	203745_at	-1.6532
KRT8	209008_x_at	-1.6501
EMR2	207610_s_at	-1.6478
ZMPSTE24	202939_at	-1.6441
RRS1	209567_at	-1.6402
CBFB	206788_s_at	-1.6284
CDC6	203968_s_at	-1.6228
HNRPU	200593_s_at	-1.6152
C10orf10	209183_s_at	-1.6121
FLJ20516	219258_at	-1.6089
TOE1	204080_at	-1.5997
ARL7	202208_s_at	-1.5982
TXNDC	208097_s_at	-1.5971
CASP8	207686_s_at	-1.596
MOSC1	218865_at	-1.5923
TGFA	211258_s_at	-1.5902
DDX3X	201211_s_at	-1.5866
HSPH1	206976_s_at	-1.5863
HIST1H4C	205967_at	-1.5852
SLC16A1	202236_s_at	-1.58
IL6ST	212196_at	-1.5785
LOC56902	203622_s_at	-1.5775
PHLDA1	217999_s_at	-1.5762
MCM4	222037_at	-1.5701
MAX	210734_x_at	-1.5656
2007-09-11	201308_s_at	-1.5637
PPP2R1B	202886_s_at	-1.5621
TSEN2	219581_at	-1.5551
PHLDA1	217996_at	-1.5512
KLK10	209792_s_at	-1.5463
KLF10	202393_s_at	-1.5455
CHRNA5	206533_at	-1.5402
KLK11	205470_s_at	-1.5381
ARL7	202207_at	-1.535
RFWD3	218564_at	-1.5346
MEST	202016_at	-1.5323
P2RY2	206277_at	-1.5304
TOR1AIP1	216100_s_at	-1.5299
KIF5B	201992_s_at	-1.5294
SERPINB13	217272_s_at	-1.529
IMP3	221688_s_at	-1.5273
SERPINB1	212268_at	-1.5268
RBM12	212168_at	-1.5243
SLC43A3	213113_s_at	-1.5231
BRCA2	214727_at	-1.52
SFRS2	200754_x_at	-1.515
HSMPP8	221771_s_at	-1.5134
GLT28D1	219015_s_at	-1.5125
PAFAH1B1	211547_s_at	-1.5123
SYNCRIP	209025_s_at	-1.5117
DDX52	210320_s_at	-1.5092
HBEGF	38037_at	-1.5014
SLC43A3	210692_s_at	-1.5004
SCYL2	221220_s_at	-1.5004
