# Supplementary material for: Loss of E-Cadherin Promotes Metastasis via Multiple Downstream Transcriptional Pathways
Source: Oxford University Press journal article supplement (doi:10.1158/0008-5472.can-07-2938), 2008-05-15
Supplement: 00085472can072938-sup-suplemantal_table_3.xls [file 00085472can072938-sup-suplemantal_table_3.xls]

## Sheet: Sheet1
Genes differentially expressed more than 1.5 log-fold in both DN-Ecad and shEcad cells
Upregulated	Downregulated
ALDH6A1	ARHGAP25
CRIP2	ARL7
CYP1B1	ATP12A
FTL	C10orf10
KCNMA1	C1orf116
KDELR3	C1orf42
KLF9	CEACAM6
LEPR	CSF2
MAGED1	CSF3
MAGED2	CXCL1
P8	CXCL2
PRKCA	CXCL3
RNASE4	CYB5R2
STC2	DSC2
TCEA2	DUSP6
TSC22D3	EDN1
WIPI49	EHF
ZBTB16	EMR2
	EPN3
	FLJ21511
	FST
	GPRC5A
	HBEGF
	HS3ST2
	IL1B
	IL1F9
	IL1R2
	IL8
	IVL
	KLK10
	KLK11
	KLK7
	KRT13
	KRT15
	KRT8
	LCN2
	MFAP5
	MMP10
	MOSC1
	MYO5C
	NAV3
	P2RY2
	PI3
	PTGS2
	PTHLH
	S100A7
	SCEL
	SERPINB1
	SERPINB13
	SERPINB2
	SOX9
	SPAG1
	SPRR2D
	ST6GALNAC5
	TGFA
	TMEM16A
	TMPRSS11E
	TP73L
	VGLL1
