# Supplementary material for: Loss of E-Cadherin Promotes Metastasis via Multiple Downstream Transcriptional Pathways
Source: Oxford University Press journal article supplement (doi:10.1158/0008-5472.can-07-2938), 2008-05-15
Supplement: 00085472can072938-sup-suplemantal_table_4.xls [file 00085472can072938-sup-suplemantal_table_4.xls]

## Sheet: Sheet1
List for Supplemental Figure 4; Genes significantly different in shEcad vs shCntrl cells that were dependent on b-catenin for their regulation
	SYMBOL
210809_s_at	POSTN
203889_at	SGNE1
202363_at	SPOCK1
205547_s_at	TAGLN
209589_s_at	EPHB2
204620_s_at	CSPG2
211165_x_at	EPHB2
221731_x_at	CSPG2
212143_s_at	IGFBP3
210095_s_at	IGFBP3
201438_at	COL6A3
214719_at	LOC283537
203088_at	FBLN5
213948_x_at	IGSF4B
210454_s_at	KCNJ6
218574_s_at	LMCD1
201309_x_at	C5orf13
205991_s_at	PRRX1
201162_at	IGFBP7
211796_s_at	TRBV3-1
212806_at	KIAA0367
202728_s_at	LTBP1
208335_s_at	DARC
211571_s_at	CSPG2
207172_s_at	CDH11
201058_s_at	MYL9
221926_s_at	IL17RC
215440_s_at	BEXL1
206116_s_at	TPM1
205206_at	KAL1
212805_at	KIAA0367
201578_at	PODXL
201310_s_at	C5orf13
208016_s_at	AGTR1
203438_at	STC2
221583_s_at	KCNMA1
219279_at	DOCK10
206298_at	ARHGAP22
213059_at	CREB3L1
214577_at	MAP1B
205357_s_at	AGTR1
221921_s_at	IGSF4B
203417_at	MFAP2
202628_s_at	SERPINE1
209230_s_at	P8
202765_s_at	FBN1
210202_s_at	BIN1
207357_s_at	GALNT10
200974_at	ACTA2
204017_at	KDELR3
207265_s_at	KDELR3
218211_s_at	MLPH
212473_s_at	MICAL2
204575_s_at	MMP19
214212_x_at	PLEKHC1
218573_at	MAGEH1
211724_x_at	FLJ20323
201261_x_at	BGN
205083_at	AOX1
218468_s_at	GREM1
202403_s_at	COL1A2
204682_at	LTBP2
202766_s_at	FBN1
218469_at	GREM1
203789_s_at	SEMA3C
217979_at	TSPAN13
203904_x_at	CD82
200632_s_at	NDRG1
202770_s_at	CCNG2
201200_at	CREG1
206170_at	ADRB2
212364_at	MYO1B
218319_at	PELI1
219209_at	IFIH1
219683_at	FZD3
208607_s_at	SAA2
207332_s_at	TFRC
202936_s_at	SOX9
203509_at	SORL1
218342_s_at	KIAA1815
203453_at	SCNN1A
218692_at	FLJ20366
202637_s_at	ICAM1
202023_at	EFNA1
202643_s_at	TNFAIP3
220161_s_at	EPB41L4B
202644_s_at	TNFAIP3
204440_at	CD83
212560_at	SORL1
200878_at	EPAS1
203407_at	PPL
210538_s_at	BIRC3
214456_x_at	SAA2
209774_x_at	CXCL2
204470_at	CXCL1
203917_at	CXADR
211506_s_at	IL8
202859_x_at	IL8
217767_at	C3

## Sheet: Sheet2
	Beta-catenin regulated genes in shEcad cells
	ACTA2	IGSF4B
	ADRB2	IL17RC
	AGTR1	IL8
	AOX1	KAL1
	ARHGAP22	KCNJ6
	BEXL1	KCNMA1
	BGN	KDELR3
	BIN1	KIAA0367
	BIRC3	KIAA1815
	C3	LMCD1
	C5orf13	LOC283537
	CCNG2	LTBP1
	CD82	LTBP2
	CD83	MAGEH1
	CDH11	MAP1B
	COL1A2	MFAP2
	COL6A3	MICAL2
	CREB3L1	MLPH
	CREG1	MMP19
	CSPG2	MYL9
	CXADR	MYO1B
	CXCL1	NDRG1
	CXCL2	P8
	DARC	PELI1
	DOCK10	PLEKHC1
	EFNA1	PODXL
	EPAS1	POSTN
	EPB41L4B	PPL
	EPHB2	PRRX1
	FBLN5	SAA2
	FBN1	SCNN1A
	FLJ20323	SEMA3C
	FLJ20366	SERPINE1
	FZD3	SGNE1
	GALNT10	SORL1
	GREM1	SOX9
	ICAM1	SPOCK1
	IFIH1	STC2
	IGFBP3	TAGLN
	IGFBP7	TFRC
		TNFAIP3
		TPM1
		TRBV3-1
		TSPAN13
