# Supplementary material for: Loss of E-Cadherin Promotes Metastasis via Multiple Downstream Transcriptional Pathways
Source: Oxford University Press journal article supplement (doi:10.1158/0008-5472.can-07-2938), 2008-05-15
Supplement: 00085472can072938-sup-supplemental_table_1.xls [file 00085472can072938-sup-supplemental_table_1.xls]

## Sheet: Sheet1
Probes and the corresponding genes upregulated more than 1.5 log-fold in shEcad cells
Symbol	ProbeID	shEcad vs shCntrl log-fold change
FBLN5	203088_at	8.5255
GREM1	218468_s_at	8.3169
GREM1	218469_at	8.1805
COL3A1	215076_s_at	7.7299
COL3A1	201852_x_at	7.5006
COL1A2	202403_s_at	7.4536
DCN	201893_x_at	7.059
COL1A2	202404_s_at	6.9349
COL3A1	211161_s_at	6.796
FBN1	202766_s_at	6.5269
NID1	202007_at	6.1547
DCN	211813_x_at	5.9537
PTX3	206157_at	5.8939
MAP1B	212233_at	5.7621
TCF8	212764_at	5.7218
ENPP2	209392_at	5.6529
CDH2	203440_at	5.637
COL1A1	202310_s_at	5.6185
POSTN	210809_s_at	5.5791
ANPEP	202888_s_at	5.4274
TCF8	212758_s_at	5.3506
RGS4	204337_at	5.3408
RGS4	204338_s_at	5.2446
DCN	211896_s_at	5.2339
C5orf13	201309_x_at	5.1119
C5orf13	201310_s_at	5.0792
CDH11	207173_x_at	5.0275
COL1A1	202311_s_at	5.0017
PRRX1	205991_s_at	4.9379
COL6A1	213428_s_at	4.8373
IGSF4B	213948_x_at	4.8178
GNG11	204115_at	4.7323
RHOBTB3	202975_s_at	4.6948
TFPI	213258_at	4.6916
FBN1	202765_s_at	4.6542
PRG1	201858_s_at	4.6237
NR2F1	209505_at	4.5814
AGTR1	205357_s_at	4.5462
BIN1	214439_x_at	4.5256
LTBP1	202729_s_at	4.5083
PDGFRL	205226_at	4.4753
LTBP1	202728_s_at	4.4565
SPOCK	202363_at	4.3719
SDC2	212158_at	4.3594
PCDH9	219737_s_at	4.2958
LOC51334	220014_at	4.2883
NEBL	203961_at	4.285
DLC1	210762_s_at	4.2619
TOX	204529_s_at	4.2601
MME	203434_s_at	4.2254
BIN1	202931_x_at	4.223
BIN1	210201_x_at	4.1982
RGL1	209568_s_at	4.1962
IGFBP4	201508_at	4.1851
ENPP2	210839_s_at	4.1777
TFPI	210664_s_at	4.1761
KCNMA1	221583_s_at	4.1568
CLEC3B	205200_at	4.1464
RHOBTB3	202976_s_at	4.1164
KCNMA1	221584_s_at	4.114
STC2	203438_at	4.1061
CDH2	203441_s_at	4.0338
2007-03-03	213256_at	4.0263
NID1	202008_s_at	4.0035
PTGFR	207177_at	3.9869
TGFBR3	204731_at	3.9797
PRKCA	213093_at	3.9304
SDC2	212154_at	3.9258
NEBL	203962_s_at	3.9088
COL1A1	217430_x_at	3.8942
PCOLCE	202465_at	3.8924
BIN1	210202_s_at	3.8882
PPP1R3C	204284_at	3.873
TBL1X	213400_s_at	3.8617
TRPA1	217590_s_at	3.8253
TFPI	209676_at	3.7594
HRASLS3	209581_at	3.7399
COL6A2	209156_s_at	3.7356
FLJ20701	219093_at	3.6949
FLJ10094	219501_at	3.6914
CYFIP2	215785_s_at	3.6637
DOCK10	219279_at	3.6455
MLPH	218211_s_at	3.6164
PVRL3	213325_at	3.5922
KAL1	205206_at	3.57
CDH11	207172_s_at	3.5632
MME	203435_s_at	3.5508
PODXL	201578_at	3.5237
WNT5B	221029_s_at	3.4653
FBLN1	202995_s_at	3.4641
PRG1	201859_at	3.4613
PSCDBP	209606_at	3.4607
OLFML3	218162_at	3.4409
ITGBL1	214927_at	3.4318
LRIG1	211596_s_at	3.4263
COL5A2	221730_at	3.4211
MMP2	201069_at	3.3894
MYL9	201058_s_at	3.3783
EML1	204797_s_at	3.3636
STC2	203439_s_at	3.3635
RGS4	204339_s_at	3.3399
BGN	213905_x_at	3.3073
AGTR1	208016_s_at	3.2925
NPTX2	213479_at	3.2837
ANXA6	200982_s_at	3.2812
COL5A2	221729_at	3.2402
BGN	201261_x_at	3.1998
CTGF	209101_at	3.1784
CYP1B1	202437_s_at	3.173
DPYSL3	201430_s_at	3.1664
PLEKHC1	209209_s_at	3.1654
MAP1B	214577_at	3.1537
2007-09-06	212414_s_at	3.1482
ITGBL1	205422_s_at	3.1269
GRB10	209409_at	3.1258
TWIST1	213943_at	3.1236
ENPP1	205066_s_at	3.1159
PNMA2	209598_at	3.1025
RPS6KA2	212912_at	3.094
PPAP2B	212226_s_at	3.0796
KIAA0367	212805_at	3.0685
PLEKHC1	214212_x_at	3.0675
ZBTB16	205883_at	3.0585
JAM3	212813_at	3.022
ARMCX2	203404_at	3.02
LIN7A	206440_at	3.013
CYP1B1	202436_s_at	3.0027
SYT11	209198_s_at	2.9614
ROR1	205805_s_at	2.948
AOX1	205082_s_at	2.9376
TCF8	210875_s_at	2.9259
	213169_at	2.9256
CYP1B1	202435_s_at	2.9067
SNED1	213488_at	2.8942
	213429_at	2.8915
CSPG2	204620_s_at	2.8839
PLEKHC1	209210_s_at	2.8782
PTGER2	206631_at	2.8688
MFAP2	203417_at	2.801
GADD45B	209305_s_at	2.7877
KCNJ6	210454_s_at	2.7577
CHN1	212624_s_at	2.7265
TNFAIP6	206026_s_at	2.7238
SGNE1	203889_at	2.7164
COL6A3	201438_at	2.7031
DDR2	205168_at	2.7007
AOX1	205083_at	2.6934
RHOBTB3	216048_s_at	2.6925
IGSF4B	221921_s_at	2.6887
DUSP1	201041_s_at	2.6673
MAGEH1	218573_at	2.6508
CSPG2	221731_x_at	2.6478
FBLN1	202994_s_at	2.6348
GADD45B	209304_x_at	2.6341
CITED2	209357_at	2.6283
TSC22D3	208763_s_at	2.5896
DPYSL3	201431_s_at	2.5757
PPAP2B	212230_at	2.5756
GADD45B	207574_s_at	2.5547
KIAA0367	212806_at	2.5471
ATP6V0E2L	213587_s_at	2.5228
LOC221362	213248_at	2.5213
C5orf13	222344_at	2.5179
REPS2	205645_at	2.5137
TSC22D3	207001_x_at	2.5086
PMP22	210139_s_at	2.4862
THY1	208850_s_at	2.4787
CITED2	207980_s_at	2.4619
TRAM2	202368_s_at	2.4611
RGS17	220334_at	2.4521
PPARG	208510_s_at	2.4455
NID2	204114_at	2.443
GRB10	210999_s_at	2.4224
PPAP2B	209355_s_at	2.4008
ZFHX4	219779_at	2.3933
APXL	204967_at	2.387
NNMT	202238_s_at	2.3753
TAGLN	205547_s_at	2.365
BEXL1	215440_s_at	2.3606
2007-09-06	214298_x_at	2.3526
TRAM2	202369_s_at	2.3508
TNFAIP6	206025_s_at	2.35
RPS6KA2	204906_at	2.3453
	218380_at	2.3413
EPHB2	209589_s_at	2.3275
CREB3L1	213059_at	2.3086
CDH18	206280_at	2.3072
DCN	209335_at	2.3029
TAF9L	221618_s_at	2.3015
FN1	214701_s_at	2.2525
FY	208335_s_at	2.2483
MLLT3	204917_s_at	2.2483
IGFBP3	212143_s_at	2.2408
CHST2	203921_at	2.2324
THY1	213869_x_at	2.2306
HMOX1	203665_at	2.2214
AP1S2	203300_x_at	2.2108
THY1	208851_s_at	2.2091
DDAH1	209094_at	2.2042
FLJ10357	58780_s_at	2.181
PCAF	203845_at	2.1804
SATB2	213435_at	2.1758
NR2F1	209506_s_at	2.1707
ITGA10	206766_at	2.1667
FGFR1	211535_s_at	2.1659
C14orf132	218820_at	2.1195
TRBV3-1	211796_s_at	2.0973
ANKRD25	218418_s_at	2.0969
FBLN1	201787_at	2.0949
GLRX	209276_s_at	2.085
NNMT	202237_at	2.0833
PTGER4	204897_at	2.0798
DNAJB4	203811_s_at	2.0786
IL17RC	221926_s_at	2.0772
RIMS1	216184_s_at	2.059
PTD015	221600_s_at	2.0505
SIX2	206510_at	2.0482
DUSP1	201044_x_at	2.048
MOXD1	209708_at	2.0426
SLITRK5	214930_at	2.0407
SEMA5A	205405_at	2.0361
CSPG2	211571_s_at	2.0221
UGDH	203343_at	2.0221
SERPINE1	202627_s_at	2.0202
CYBRD1	217889_s_at	2.0171
PTD015	221599_at	2.0043
C10orf56	212423_at	2.0003
SPARC	212667_at	1.9817
COL6A1	212091_s_at	1.9724
BIN1	214643_x_at	1.9536
SERPINF1	202283_at	1.9509
EPHB2	211165_x_at	1.9487
MYBL1	213906_at	1.9469
HAS2	206432_at	1.9418
MMP19	204575_s_at	1.936
FLOT1	210142_x_at	1.9346
IGSF4B	211677_x_at	1.9324
C14orf45	220173_at	1.9304
EML1	204796_at	1.921
ABLIM3	205730_s_at	1.9203
ASMTL	36553_at	1.9185
FAM50A	203262_s_at	1.9182
DNAJB4	203810_at	1.9164
LTBP2	204682_at	1.913
BLMH	202179_at	1.9106
CCNE2	211814_s_at	1.9074
GSTA4	202967_at	1.8988
P8	209230_s_at	1.8972
SERPINE1	202628_s_at	1.8898
LMCD1	218574_s_at	1.8886
CDKN2C	204159_at	1.8861
ALS2CR3	202125_s_at	1.8845
DSCR1L1	203498_at	1.8783
MICAL2	212472_at	1.8709
FLOT1	208749_x_at	1.8679
TPM1	206117_at	1.8502
GALNT10	212256_at	1.8495
KLF9	203542_s_at	1.8482
ADAM12	202952_s_at	1.848
FLJ22471	218175_at	1.8475
GULP1	204235_s_at	1.84
TPM1	206116_s_at	1.8341
SLC7A2	207626_s_at	1.8309
WNT5A	205990_s_at	1.8212
IGFBP3	210095_s_at	1.8193
WIPI49	203827_at	1.8116
RHOBTB1	212651_at	1.8102
DOCK4	205003_at	1.8099
MITF	207233_s_at	1.8037
SLC22A4	205896_at	1.7989
ABCA8	204719_at	1.7957
FTL	213187_x_at	1.7896
ITGA7	216331_at	1.7879
MICAL2	212473_s_at	1.7868
COL5A1	212488_at	1.7856
ICK	204569_at	1.7806
WASPIP	202664_at	1.7791
GULP1	204237_at	1.7714
SYNE1	209447_at	1.7709
ACTA2	200974_at	1.7656
DAB2	201280_s_at	1.7644
BPGM	203502_at	1.7578
	218031_s_at	1.7491
CDK5RAP2	220935_s_at	1.7471
AP1S2	203299_s_at	1.7461
NAP1L3	204749_at	1.7393
GRB10	209410_s_at	1.7384
GULP1	215913_s_at	1.7375
	220999_s_at	1.7345
	218330_s_at	1.7324
ARL3	202641_at	1.7192
MAGED2	208682_s_at	1.7112
RECK	205407_at	1.7095
PRAF2	203456_at	1.7086
ARHGAP22	206298_at	1.7063
PPM1H	212686_at	1.7038
GALNT10	207357_s_at	1.7033
DMN	212730_at	1.7032
PLOD2	202619_s_at	1.6983
LOC283537	214719_at	1.6975
ZNF22	218005_at	1.6956
ASMTL	209394_at	1.6866
PRKCA	215195_at	1.6862
UQCRB	209065_at	1.6852
PRR3	204795_at	1.684
C14orf58	219316_s_at	1.6808
COL8A1	214587_at	1.678
TCEA2	203919_at	1.6771
GLRB	205280_at	1.6725
FZD2	210220_at	1.6697
KDELR3	207265_s_at	1.6632
LOX	215446_s_at	1.6617
NRP1	210510_s_at	1.6592
KDELR3	204017_at	1.6563
CMKOR1	212977_at	1.6455
GK	215977_x_at	1.6444
SV2A	203069_at	1.6432
EPS8	202609_at	1.6423
IGFBP7	201162_at	1.629
FLOT1	208748_s_at	1.6267
LEPR	209894_at	1.6259
ARID5B	212614_at	1.6213
GYPC	202947_s_at	1.6194
MARCKS	201668_x_at	1.6188
PCOLCE2	219295_s_at	1.6176
SRR	219205_at	1.6172
HOXA5	213844_at	1.6096
KLF4	220266_s_at	1.5983
GLRB	205279_s_at	1.5893
ZNF22	218006_s_at	1.5887
FTL	212788_x_at	1.584
ENO2	201313_at	1.5833
ALS2CR3	202124_s_at	1.5833
STARD13	213103_at	1.5808
FLJ14627	221909_at	1.5775
FGFR1	210973_s_at	1.5773
FLJ20323	211724_x_at	1.5754
SDC3	202898_at	1.5689
C10orf56	212419_at	1.5671
DGKI	206806_at	1.5665
MAGED1	209014_at	1.5658
FLJ10357	220326_s_at	1.5623
ALDH6A1	221588_x_at	1.5614
CRIP2	208978_at	1.5575
2007-09-11	214293_at	1.549
COL6A1	212937_s_at	1.5474
REPIN1	219041_s_at	1.5431
C6orf145	212923_s_at	1.5427
DAB2	201279_s_at	1.5419
HRMT1L1	202098_s_at	1.5408
H2AFY	214500_at	1.535
TBL1X	201867_s_at	1.5302
PTGER4	204896_s_at	1.5282
EDG2	204036_at	1.5264
	212829_at	1.5233
FKBP5	204560_at	1.5212
NEBL	207279_s_at	1.5195
FAT4	219427_at	1.5102
RNASE4	213397_x_at	1.5049
Probes and the corresponding genes downregulated more than 1.5 log-fold in shEcad cells
Symbol	ProbeID	shEcad vs shCntrl log-fold change
SERPINB2	204614_at	-8.0717
KLK10	209792_s_at	-7.5327
SPRR1B	205064_at	-7.4097
SPRR1A	213796_at	-7.2153
S100A8	202917_s_at	-7.2083
SLPI	203021_at	-7.0663
KRT6B	213680_at	-7.0042
KLK7	205778_at	-6.9354
SPRR1A	214549_x_at	-6.8801
PI3	41469_at	-6.8045
ALDH1A3	203180_at	-6.6936
CDH1	201131_s_at	-6.6337
IL1A	210118_s_at	-6.6207
KRT15	204734_at	-6.4087
TACSTD1	201839_s_at	-6.3193
FXYD3	202489_s_at	-5.9706
SPRR2D	208539_x_at	-5.7607
FST	204948_s_at	-5.742
FST	207345_at	-5.6254
SERPINB13	217272_s_at	-5.621
PI3	203691_at	-5.6163
EVA1	203780_at	-5.4362
ANXA3	209369_at	-5.3846
TGFA	205016_at	-5.3115
C3	217767_at	-5.2584
KLK5	222242_s_at	-5.119
RBM35A	219121_s_at	-5.1177
TMEM30B	213285_at	-5.0971
IL1R2	205403_at	-5.0927
RAB25	218186_at	-5.0546
SAA2	214456_x_at	-5.0394
IL1B	205067_at	-5.0166
FGFBP1	205014_at	-5.0029
FGFR3	204379_s_at	-4.9797
DSC2	204751_x_at	-4.9795
TP73L	209863_s_at	-4.9643
SERPINB1	212268_at	-4.9641
S100A7	205916_at	-4.956
NMU	206023_at	-4.9272
C1orf116	219476_at	-4.9244
KRT16	209800_at	-4.8836
S100A14	218677_at	-4.8681
CKMT1B	202712_s_at	-4.8513
MMP10	205680_at	-4.8207
KLK8	206125_s_at	-4.7629
IL1B	39402_at	-4.7398
DSG3	205595_at	-4.7293
GJB3	205490_x_at	-4.7065
GJB3	215243_s_at	-4.6965
DSC3	206033_s_at	-4.6921
EVA1	203779_s_at	-4.6783
DSC3	206032_at	-4.6599
CDH3	203256_at	-4.5706
SPINT1	202826_at	-4.5679
SCNN1A	203453_at	-4.5591
CDH1	201130_s_at	-4.514
SFRP1	202037_s_at	-4.4983
TP73L	211194_s_at	-4.4762
CCND2	200951_s_at	-4.4681
KRT13	207935_s_at	-4.4411
CA2	209301_at	-4.4283
SERPINB1	213572_s_at	-4.4214
AQP3	39248_at	-4.3964
KRT6B	209126_x_at	-4.3788
SAA2	208607_s_at	-4.3689
IL1RN	212657_s_at	-4.3471
TSPAN1	209114_at	-4.3434
DSC2	204750_s_at	-4.3339
ZBED2	219836_at	-4.2963
CCND2	200953_s_at	-4.2958
COL17A1	204636_at	-4.2939
DST	204455_at	-4.2654
SERPINB7	206421_s_at	-4.2502
RBM35B	219395_at	-4.2357
GJB5	206156_at	-4.2244
SEMA3A	206805_at	-4.1803
PPL	203407_at	-4.1802
TRIM29	202504_at	-4.1737
IL1R2	211372_s_at	-4.1643
ARTN	210237_at	-4.158
ST14	202005_at	-4.1383
EREG	205767_at	-4.1329
TMEM16A	218804_at	-4.1232
FLJ12684	219987_at	-4.0924
IRF6	202597_at	-4.085
ARTN	207675_x_at	-4.0846
INHBA	210511_s_at	-4.0806
CXCL1	204470_at	-4.0754
TNFAIP3	202643_s_at	-4.0657
CSTA	204971_at	-4.0473
CD24	266_s_at	-4.037
S100A9	203535_at	-4.0267
VSNL1	203798_s_at	-4.0208
LAMB3	209270_at	-4.0207
CDS1	205709_s_at	-4.0154
ST14	216905_s_at	-4.0118
CD24	208651_x_at	-4.011
TNFAIP3	202644_s_at	-4.0056
SPINT2	210715_s_at	-3.9916
SFRP1	202036_s_at	-3.9871
FLRT3	219250_s_at	-3.9723
MAPK13	210058_at	-3.9676
SERPINB13	211361_s_at	-3.9426
CD24	209772_s_at	-3.9378
SLAC2-B	214734_at	-3.9259
MFAP5	213764_s_at	-3.9144
SLC2A9	219991_at	-3.9037
TACSTD2	202286_s_at	-3.8993
VSNL1	203797_at	-3.8677
KCNK1	204679_at	-3.8465
ABLIM1	200965_s_at	-3.8298
CEACAM6	211657_at	-3.7978
TPD52L1	203786_s_at	-3.7828
HS3ST2	219697_at	-3.7793
CD24	216379_x_at	-3.7742
SERPINA1	202833_s_at	-3.7566
CD24	209771_x_at	-3.7566
CYP27B1	205676_at	-3.7529
CD24	208650_s_at	-3.741
GPR56	212070_at	-3.7311
PTGS2	204748_at	-3.724
PCDH7	205534_at	-3.7072
DDR1	210749_x_at	-3.6849
MMP9	203936_s_at	-3.6812
KCNK1	204678_s_at	-3.6525
KRT8	209008_x_at	-3.6445
NRCAM	204105_s_at	-3.6417
TNFRSF6B	206467_x_at	-3.6272
DST	216918_s_at	-3.6262
JAG2	32137_at	-3.6194
PLA2G4A	210145_at	-3.6193
SCEL	206884_s_at	-3.616
IGSF3	202421_at	-3.6127
ARTN	216052_x_at	-3.6079
JUP	201015_s_at	-3.5903
VGLL1	215729_s_at	-3.5821
WISP3	210861_s_at	-3.58
CEACAM6	203757_s_at	-3.5544
MFAP5	213765_at	-3.5389
CLCA2	206165_s_at	-3.5318
LAMA3	203726_s_at	-3.5096
MAP7	202890_at	-3.5069
ST6GALNAC2	204542_at	-3.5046
PKP3	209873_s_at	-3.4894
HS3ST1	205466_s_at	-3.4885
ARHGAP8	37117_at	-3.4827
KRT6A	214580_x_at	-3.4803
MST1R	205455_at	-3.4788
SOX15	206122_at	-3.4785
CLCA2	217528_at	-3.4718
SNX10	218404_at	-3.467
TSPAN13	217979_at	-3.461
KIAA0746	212314_at	-3.4417
CTSL2	210074_at	-3.4204
F11R	221664_s_at	-3.4129
CLCA2	206166_s_at	-3.4108
PRR5	205980_s_at	-3.4074
CLDN7	202790_at	-3.4059
JAG2	209784_s_at	-3.3989
ARHGEF3	218501_at	-3.3836
C10orf10	209183_s_at	-3.3761
DDR1	208779_x_at	-3.3719
MMP1	204475_at	-3.3695
TPD52L1	210372_s_at	-3.3566
FRMD4B	213056_at	-3.3527
LAMC2	207517_at	-3.3308
MFAP5	209758_s_at	-3.3306
MTSS1	203037_s_at	-3.324
TGFA	205015_s_at	-3.3226
FEZ1	203562_at	-3.3156
KRT5	201820_at	-3.3148
ANXA8	203074_at	-3.3148
LCN2	212531_at	-3.3045
FGFR2	203638_s_at	-3.302
CNTN1	211203_s_at	-3.2895
ITGB6	208083_s_at	-3.2884
GPRC5A	203108_at	-3.2842
RAB38	219412_at	-3.2708
ITGB4	204990_s_at	-3.2688
DDR1	207169_x_at	-3.2506
SLC6A15	206376_at	-3.2303
PRRG4	207291_at	-3.2143
KRT18	201596_x_at	-3.2058
MAPK13	210059_s_at	-3.1947
SDC1	201286_at	-3.187
KRT6A	209125_at	-3.1851
GRHL2	219388_at	-3.1843
PERP	217744_s_at	-3.1795
OCLN	209925_at	-3.1688
ALOX15B	206714_at	-3.1622
MALL	209373_at	-3.1618
	218764_at	-3.1519
KRT17	205157_s_at	-3.1434
FXYD3	202488_s_at	-3.1367
FGFR2	208228_s_at	-3.1343
IL8	202859_x_at	-3.1341
TMEM40	219503_s_at	-3.1329
PTHLH	211756_at	-3.1277
SDC1	201287_s_at	-3.1196
GPR87	219936_s_at	-3.0864
MAP7	202889_x_at	-3.0855
CASP1	211368_s_at	-3.0746
LYPD3	204952_at	-3.0696
PTHLH	210355_at	-3.0671
C10orf116	203571_s_at	-3.0648
LISCH7	208190_s_at	-3.0621
P2RX5	210448_s_at	-3.0565
MAP7	215471_s_at	-3.047
AP1M2	218261_at	-3.044
ITGB4	204989_s_at	-3.0392
TMPRSS11E	220431_at	-3.039
DSP	200606_at	-3.0369
KRT17	212236_x_at	-3.0288
KIAA0040	203143_s_at	-3.028
PTPRZ1	204469_at	-3.026
NDRG1	200632_s_at	-3.0254
EPN3	220318_at	-3.0253
IFI30	201422_at	-3.0218
SERPINA1	211429_s_at	-3.0193
ARL7	202207_at	-3.0179
EHF	219850_s_at	-3.0117
C1orf116	219856_at	-3.0062
COBLL1	203641_s_at	-3.0017
PRSS8	202525_at	-3.0008
CAMK2B	209956_s_at	-2.9882
ITGB6	208084_at	-2.9867
MYO1D	212338_at	-2.9764
CYB5R2	220230_s_at	-2.9722
BMP2	205290_s_at	-2.968
	213929_at	-2.9656
IL18	206295_at	-2.9641
HOOK1	219976_at	-2.9637
MIA	206560_s_at	-2.9577
EDG7	220816_at	-2.9522
IL8	211506_s_at	-2.9502
CAMK2B	210404_x_at	-2.9363
DDR1	1007_s_at	-2.9327
LPHN2	206953_s_at	-2.9306
ATP12A	207367_at	-2.9275
ST6GALNAC5	220979_s_at	-2.9232
CNTNAP2	215145_s_at	-2.922
LAD1	203287_at	-2.8918
ICAM1	202637_s_at	-2.8913
SYK	207540_s_at	-2.8889
ARL7	202206_at	-2.8886
LAMC2	202267_at	-2.8866
CASP1	209970_x_at	-2.8825
ERBB3	202454_s_at	-2.8806
IFIH1	219209_at	-2.8781
EPS8L1	91826_at	-2.8772
CCL20	205476_at	-2.8663
NAV3	204823_at	-2.8646
CXCL2	209774_x_at	-2.8508
SLC1A3	202800_at	-2.842
CLCA2	206164_at	-2.8367
ZNF185	203585_at	-2.8347
CCND2	200952_s_at	-2.8135
ITGA2	205032_at	-2.8122
GPM6B	209169_at	-2.8085
COBLL1	203642_s_at	-2.7934
CENTD1	213618_at	-2.7851
BACE2	217867_x_at	-2.783
ABCA12	215465_at	-2.7785
SFRP1	202035_s_at	-2.77
SOX9	202936_s_at	-2.7474
ST6GAL1	201998_at	-2.7459
C20orf42	60474_at	-2.7443
CELSR1	41660_at	-2.7333
KLF5	209211_at	-2.7262
PCDH7	205535_s_at	-2.7208
AREG	205239_at	-2.7179
CA9	205199_at	-2.7178
CXADR	203917_at	-2.7145
EFNA1	202023_at	-2.7139
FLJ21511	220723_s_at	-2.7075
GPM6B	209168_at	-2.6897
IL1F9	220322_at	-2.6885
MCOLN3	220484_at	-2.6853
SNCA	204466_s_at	-2.6822
AMPD3	207992_s_at	-2.6769
PTHLH	206300_s_at	-2.6713
ARHGEF4	205109_s_at	-2.6695
LAD1	216641_s_at	-2.6693
SLC39A8	209267_s_at	-2.6649
ITGA6	215177_s_at	-2.6535
KIAA0746	212311_at	-2.6529
XDH	210301_at	-2.6468
TGFA	211258_s_at	-2.6412
ARHGAP25	38149_at	-2.6367
SOX9	202935_s_at	-2.6291
LEPREL1	218717_s_at	-2.6225
ARHGAP25	204882_at	-2.6175
DUOX1	219597_s_at	-2.6131
KLF5	209212_s_at	-2.6122
MYO5C	218966_at	-2.5998
SLC39A8	219869_s_at	-2.599
TINAGL1	219058_x_at	-2.5933
CREG1	201200_at	-2.5842
CDC2L2	210473_s_at	-2.5773
KRT14	209351_at	-2.5688
CA12	204508_s_at	-2.5675
CTSC	201487_at	-2.547
MBP	210136_at	-2.5457
TFCP2L1	219735_s_at	-2.5117
SLC7A5	201195_s_at	-2.4963
KIBRA	216074_x_at	-2.4874
AKR1C2	209699_x_at	-2.4775
CA12	203963_at	-2.4733
CST6	206595_at	-2.4664
IVL	214599_at	-2.4623
UPP1	203234_at	-2.457
LGALS7	206400_at	-2.451
P2RY2	206277_at	-2.4449
TNFSF10	202688_at	-2.4372
PITPNC1	219155_at	-2.4367
CASP1	211366_x_at	-2.4346
KIBRA	213085_s_at	-2.4305
TIMP3	201147_s_at	-2.4287
ARL7	202208_s_at	-2.4239
PTGES	210367_s_at	-2.4235
MCTP2	220603_s_at	-2.4224
SORL1	212560_at	-2.409
EPHA1	205977_s_at	-2.4074
GRB14	206204_at	-2.3965
CASP1	211367_s_at	-2.3904
HOMER1	213793_s_at	-2.3838
C1orf106	219010_at	-2.3836
MGST2	204168_at	-2.3758
SERPINB13	211362_s_at	-2.3753
APOC1	204416_x_at	-2.3719
GALNT6	219956_at	-2.3662
FZD3	219683_at	-2.3656
MOSC1	218865_at	-2.3647
C20orf42	218796_at	-2.3518
ADRB2	206170_at	-2.3515
CD44	217523_at	-2.3486
ABCG2	209735_at	-2.345
L1CAM	204584_at	-2.3411
ITGA6	201656_at	-2.3405
C6orf105	215100_at	-2.3374
AP1G1	215867_x_at	-2.3348
CA12	210735_s_at	-2.3279
F3	204363_at	-2.3253
SLC31A2	204204_at	-2.3245
AP1M2	65517_at	-2.3156
SERPINB13	216258_s_at	-2.3142
AKR1C1	204151_x_at	-2.3112
TRIM29	211002_s_at	-2.3103
SLC6A8	210854_x_at	-2.3101
KIAA1815	218342_s_at	-2.3097
CXCL3	207850_at	-2.3084
RNF128	219263_at	-2.2968
TMEM22	219569_s_at	-2.2931
HES1	203394_s_at	-2.285
KCNG1	214595_at	-2.284
GPM6B	209170_s_at	-2.2833
FAT2	208153_s_at	-2.2746
MPPE1	214071_at	-2.2689
TNFRSF21	214581_x_at	-2.2674
NFE2L3	204702_s_at	-2.2672
C1orf42	220620_at	-2.2661
GCLC	202922_at	-2.2655
LYN	210754_s_at	-2.2651
BIK	205780_at	-2.2641
CSH2	212737_at	-2.2632
MPPE1	213924_at	-2.2583
GALNT14	219271_at	-2.2465
FOS	209189_at	-2.2456
S100A8	214370_at	-2.2432
SLC5A1	206628_at	-2.2408
IRX4	220225_at	-2.2365
SPAG1	210117_at	-2.2332
SLC6A10	215812_s_at	-2.2312
AKR1C1	216594_x_at	-2.2277
MOBKL2B	219265_at	-2.2269
VDR	204254_s_at	-2.2098
ZNF165	206683_at	-2.2031
ARG2	203946_s_at	-2.2023
EPB41L4B	220161_s_at	-2.2021
LYN	202626_s_at	-2.1997
DMD	203881_s_at	-2.1964
CDCP1	218451_at	-2.193
BDKRB2	205870_at	-2.1912
CLDN4	201428_at	-2.1895
MAP3K9	213927_at	-2.1833
RHOD	209885_at	-2.1829
GPM6B	209167_at	-2.182
HBEGF	203821_at	-2.1753
IL1RN	216243_s_at	-2.1707
IL4R	203233_at	-2.1625
STAC	205743_at	-2.1585
SERPINA3	202376_at	-2.1547
CD1D	205789_at	-2.1538
CA12	214164_x_at	-2.1517
	212444_at	-2.1452
ITM2A	202747_s_at	-2.1426
SLC6A8	213843_x_at	-2.14
ELMO3	219411_at	-2.1339
PARP12	218543_s_at	-2.1333
DSU	219648_at	-2.1314
CLDN1	218182_s_at	-2.1298
MAST4	40016_g_at	-2.1282
KLK11	205470_s_at	-2.1193
PLXNB1	215807_s_at	-2.1157
GCLC	202923_s_at	-2.1145
GALNT3	203397_s_at	-2.1083
EDN1	218995_s_at	-2.1041
NRG1	206343_s_at	-2.1037
SLC7A8	216604_s_at	-2.0926
S100P	204351_at	-2.0883
SFN	209260_at	-2.0834
PSTPIP2	219938_s_at	-2.0818
AQP3	39249_at	-2.0774
TFPI2	209277_at	-2.0706
GNA15	205349_at	-2.0669
IGSF4	209030_s_at	-2.0663
THBD	203887_s_at	-2.066
MAOA	204388_s_at	-2.0623
RLN2	214519_s_at	-2.0609
CORO1A	209083_at	-2.0592
STEAP1	205542_at	-2.0511
CYP4F11	206153_at	-2.0509
STAP2	221610_s_at	-2.046
PTPNS1	202897_at	-2.0386
HBEGF	38037_at	-2.0319
LYN	202625_at	-2.0312
KRTHB1	213711_at	-2.0263
FGD6	219901_at	-2.0259
LIMK2	202193_at	-2.0259
FLJ20273	218035_s_at	-2.0204
HPSE	219403_s_at	-2.0146
KLK10	215808_at	-2.0139
SRCAP	213667_at	-2.0127
SH2D3A	219513_s_at	-2.0123
TIMP3	201150_s_at	-2.0097
ICAM1	202638_s_at	-2.0055
TNFSF10	202687_s_at	-2.0035
KCNJ15	210119_at	-2.0023
DUSP6	208892_s_at	-1.9934
SLC12A8	219874_at	-1.9911
CCNA1	205899_at	-1.9898
PTAFR	211661_x_at	-1.9895
PAMCI	210335_at	-1.9858
VDR	204255_s_at	-1.9857
AKR1C2	211653_x_at	-1.9829
POPDC3	219926_at	-1.9756
SLC6A8	202219_at	-1.9707
LOC254531	40472_at	-1.9683
SORL1	203509_at	-1.9654
MTUS1	212096_s_at	-1.9616
SLC27A3	222217_s_at	-1.9544
CNTNAP2	219300_s_at	-1.9506
DUSP6	208893_s_at	-1.9492
TIMP3	201148_s_at	-1.9455
C2orf31	221245_s_at	-1.9452
SLC2A3	202499_s_at	-1.942
CNTNAP2	219301_s_at	-1.9389
GM2A	35820_at	-1.9388
B3GNT3	204856_at	-1.9381
CD83	204440_at	-1.9367
IGSF4	209031_at	-1.9341
LRRC1	218816_at	-1.9321
RIMS3	204730_at	-1.9288
PDPN	204879_at	-1.9271
FLJ20366	218692_at	-1.9268
BIRC3	210538_s_at	-1.9197
RIPK4	221215_s_at	-1.9156
CAMK2N1	218309_at	-1.9131
TIAF1	202039_at	-1.9119
TNFRSF21	218856_at	-1.9072
D4S234E	209569_x_at	-1.9066
SLC3A2	200924_s_at	-1.9053
ANK3	206385_s_at	-1.9012
EPAS1	200878_at	-1.9009
ROBO1	213194_at	-1.899
DUSP6	208891_at	-1.8986
OAS3	218400_at	-1.8964
MYO1B	212364_at	-1.8945
SEMA3C	203789_s_at	-1.888
CDK5R1	204995_at	-1.887
CELSR2	36499_at	-1.8833
C10orf10	209182_s_at	-1.8828
FLJ20130	220520_s_at	-1.8787
TIMP3	201149_s_at	-1.8739
ITGB4	211905_s_at	-1.8721
NRG1	206237_s_at	-1.8691
C19orf21	212925_at	-1.8647
IL13RA2	206172_at	-1.8611
RHOD	31846_at	-1.8605
LGR4	218326_s_at	-1.8593
IL15RA	207375_s_at	-1.8579
F11R	222354_at	-1.8577
KIAA0040	203144_s_at	-1.8572
KIAA0888	213954_at	-1.8566
FAM69A	216044_x_at	-1.8549
DAPP1	219290_x_at	-1.8511
ABLIM1	210461_s_at	-1.8451
S100A2	204268_at	-1.8326
MYO1E	203072_at	-1.8299
TREM2	219725_at	-1.8197
SLC7A8	202752_x_at	-1.8139
SNCA	207827_x_at	-1.8079
KIAA0247	202181_at	-1.8064
SDC4	202071_at	-1.8064
TBC1D4	203387_s_at	-1.8057
EMR2	207610_s_at	-1.8034
PIP5K2C	218942_at	-1.8023
MAST4	210958_s_at	-1.8022
HERC6	219352_at	-1.8001
PELI1	218319_at	-1.7998
PRKCZ	202178_at	-1.7989
CYB5R1	202263_at	-1.7985
SEMA3C	203788_s_at	-1.7971
IER3	201631_s_at	-1.7914
ARHGEF5	204765_at	-1.79
DHRS1	213279_at	-1.7887
TCF7L1	221016_s_at	-1.7815
DAF	201925_s_at	-1.7798
PLAU	205479_s_at	-1.7782
CAMK2B	211483_x_at	-1.769
AQP3	203747_at	-1.7673
PTPRE	221840_at	-1.764
HOXA1	214639_s_at	-1.7623
CYB561	209164_s_at	-1.7599
DUSP10	221563_at	-1.7592
LY75	205668_at	-1.7585
MARK1	221047_s_at	-1.7535
SRCAP	38766_at	-1.7521
KIAA1026	213478_at	-1.7459
PTPRF	200637_s_at	-1.7458
FLJ20035	218986_s_at	-1.7428
CYB561	209163_at	-1.7424
KIAA1609	221843_s_at	-1.7385
	212812_at	-1.7362
ANKRD15	213005_s_at	-1.7324
EDG4	206723_s_at	-1.7306
CBLC	220638_s_at	-1.7292
QPCT	205174_s_at	-1.7281
AGRN	212285_s_at	-1.7255
HDAC9	205659_at	-1.7235
EPS8L2	218180_s_at	-1.7194
NCF2	209949_at	-1.7187
CD9	201005_at	-1.7177
C20orf19	219961_s_at	-1.7148
TNFRSF25	219423_x_at	-1.7141
PLAU	211668_s_at	-1.7136
FAM69A	213689_x_at	-1.7094
DDX58	218943_s_at	-1.7079
LTB	207339_s_at	-1.7078
TAGLN3	204743_at	-1.7064
TLR2	204924_at	-1.7063
ISG20	204698_at	-1.7003
TMPRSS4	218960_at	-1.6954
PTPN3	203997_at	-1.6947
G0S2	213524_s_at	-1.6882
ATP2B4	212135_s_at	-1.6857
PAK6	219461_at	-1.6832
ATP2B4	212136_at	-1.6752
FGFR2	203639_s_at	-1.6688
ADAM8	205180_s_at	-1.666
CCNG2	202770_s_at	-1.6635
CSF2	210229_s_at	-1.6632
LOC254531	213078_x_at	-1.66
NRCAM	216959_x_at	-1.66
CEACAM1	209498_at	-1.6558
ARHGDIB	201288_at	-1.653
IGSF4	209032_s_at	-1.6525
CD82	203904_x_at	-1.6524
SLC20A2	202744_at	-1.6485
TFRC	207332_s_at	-1.6453
PLK2	201939_at	-1.6444
ZNF574	221844_x_at	-1.6422
ALS2CL	222333_at	-1.6412
FLNB	208613_s_at	-1.6403
CELSR2	204029_at	-1.6368
KCNN4	204401_at	-1.6368
CSF3	207442_at	-1.6344
IL1RAP	210233_at	-1.6342
ZHX2	203556_at	-1.6336
PTPRF	200635_s_at	-1.6258
RIMS2	206137_at	-1.6253
GM2A	209727_at	-1.6248
AGRN	217419_x_at	-1.6132
MYO1B	212365_at	-1.6123
DSCAM	211484_s_at	-1.6085
CTSH	202295_s_at	-1.6042
SMPDL3B	205309_at	-1.6022
AIM1	212543_at	-1.5998
ZC3H12A	218810_at	-1.5985
DSG2	217901_at	-1.5952
TFPI2	209278_s_at	-1.5944
SEMA3F	35666_at	-1.5894
PRKCH	206099_at	-1.5862
HLA-DOB	205671_s_at	-1.5844
NBEAL2	212443_at	-1.584
SERPINB3	209719_x_at	-1.5826
TMEM51	218815_s_at	-1.5789
GM2A	33646_g_at	-1.5726
RSNL2	219944_at	-1.5707
INPP4B	205376_at	-1.5695
HSPA5BP1	218834_s_at	-1.5661
OVOL2	211778_s_at	-1.5638
HES1	203395_s_at	-1.5615
RAPGEF5	204681_s_at	-1.5612
RAB17	218931_at	-1.561
SLC7A8	216092_s_at	-1.5609
HOOK2	218780_at	-1.5608
SLC39A8	216504_s_at	-1.5583
TP73L	211834_s_at	-1.5549
CYP1A1	205749_at	-1.5526
CORO2A	205538_at	-1.5522
GCH1	204224_s_at	-1.5516
RHBDL6	219202_at	-1.5419
KCNJ15	211806_s_at	-1.5417
EVI1	221884_at	-1.5407
TRIM34	221044_s_at	-1.5355
SEMA3B	203071_at	-1.527
AKAP1	201675_at	-1.5261
AJAP1	215789_s_at	-1.5204
ZDHHC13	219296_at	-1.5179
EPLIN	217892_s_at	-1.5146
GNAL	206355_at	-1.5145
BHLHB3	221530_s_at	-1.5116
LRP12	220253_s_at	-1.5109
RPS6KA1	203379_at	-1.5083
FHOD3	218980_at	-1.5013
B4GALT4	210540_s_at	-1.5012
PTPRF	200636_s_at	-1.5005
